# Supplementary material for: Investigating Population-scale Allele Specific Expression in Wild Populations of Oithona similis (Cyclopoida, Claus 1866)
Source: bioRxiv or medRxiv preprint supplement (doi:10.1101/599076), 2020-01-31
Supplement: Supplementary file [file media-1.pdf]

# Linking Allele-Specific Expression And Natural Selection In Wild Populations

Romuald Laso-Jadart<sup>1,6\*</sup>, Kevin Sugier<sup>1</sup>, Emmanuelle Petit<sup>2</sup>, Karine Labadie<sup>2</sup>, Pierre Peterlongo<sup>3</sup>, Christophe Ambroise<sup>4</sup>, Patrick Wincker<sup>1,6</sup>, Jean-Louis Jamet<sup>5</sup>, Mohammed-Amin Madoui<sup>1,6\*</sup>

<sup>1</sup>Génomique Métabolique, Genoscope, Institut François Jacob, CEA, CNRS, Univ Evry, Université Paris-Saclay, Evry, France.

<sup>2</sup>CEA, Genoscope, Institut de Biologie François Jacob, Université Paris-Saclay, Evry, 91057, France.

<sup>3</sup>Univ Rennes, CNRS, Inria, IRISA - UMR 6074, F-35000 Rennes.

<sup>4</sup>LaMME, CNRS, Univ Evry, Université Paris-Saclay, Evry, France

<sup>5</sup>Université de Toulon, Aix-Marseille Université, CNRS/INSU/IRD, Mediterranean Institute of Oceanology MIO UMR 110, CS 60584, 83041 Toulon cedex 9, France.

<sup>6</sup>Research Federation for the study of Global Ocean Systems Ecology and Evolution, FR2022/Tara Oceans GO-SEE, 3 rue Michel-Ange, 75016 Paris, France

\*Corresponding authors. Emails: [rlasojad@genoscope.cns.fr](mailto:rlasojad@genoscope.cns.fr) & [amadoui@genoscope.cns.fr](mailto:amadoui@genoscope.cns.fr)

## Supplementary figures

|                                                                                                                                  |    |
|----------------------------------------------------------------------------------------------------------------------------------|----|
| Supplementary Figure 1: Method pipeline overview .....                                                                           | 3  |
| Supplementary Figure 2: Validation of taxonomic assignation.....                                                                 | 4  |
| Supplementary Figure 3: <i>Oithona similis</i> depth of coverage of biallelic loci in seven <i>Tara</i> Oceans samples. ....     | 5  |
| Supplementary Figure 4: Metagenomic coverage distribution of the seven <i>Tara</i> Oceans samples. ....                          | 6  |
| Supplementary Figure 5: Genomic differentiation of Arctic Seas <i>Oithona similis</i> populations.                               | 7  |
| Supplementary Figure 6: Allele-specific expression detection.....                                                                | 8  |
| Supplementary Figure 7: Functional analysis of <i>Oithona similis</i> transcripts targeted by ASE and selection.....             | 9  |
| Supplementary Table 1: <i>Oithona similis</i> Mediterranean transcriptomes summary. ....                                         | 10 |
| Supplementary Table 2: <i>Tara</i> Oceans and <i>Oithona similis</i> Mediterranean transcriptomes samples accession numbers..... | 11 |
| Supplementary Table 5: Variant annotation by SNPeff. ....                                                                        | 12 |
| References.....                                                                                                                  | 13 |

# Supplementary Figure 1: Method pipeline overview

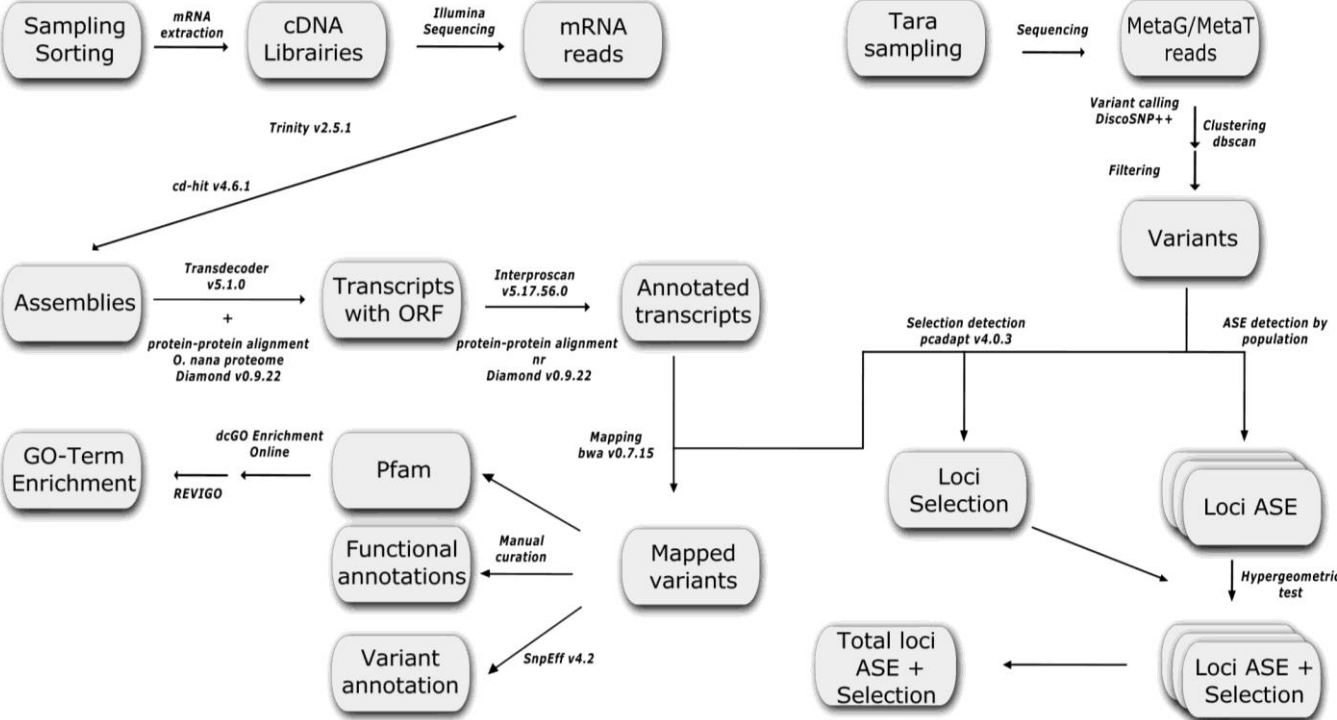

**Supplementary Figure 2: Validation of taxonomic assignment.** In rows are represented the 82 accession numbers of *Oithona* species 28S sequences. In bold, type localities of *O. similis* as described in Cornils et al., 2017. In columns are represented ribosomal read sets of the eight individuals.

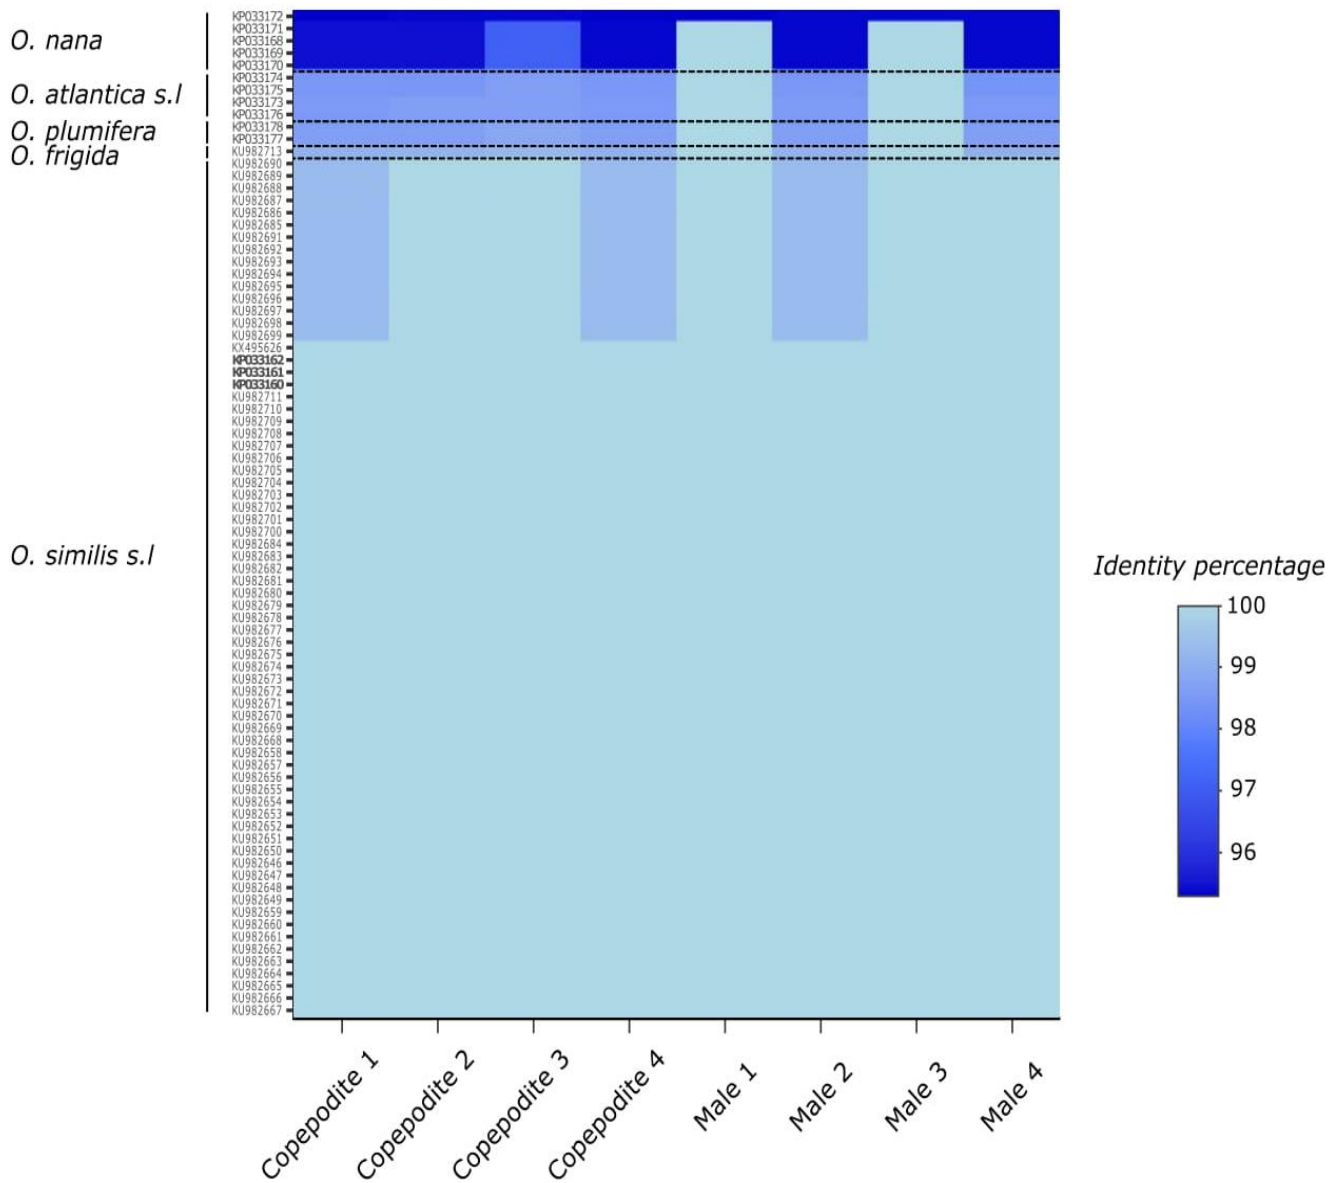

**Supplementary Figure 3: *Oithona similis* depth of coverage of biallelic loci in seven *Tara* Oceans samples.** In red is represented the theoretical depth of coverage. In black is represented the observed depth of coverage. **a**, Comparison of coverage distribution. **b**, Comparison of the cumulative distribution functions.

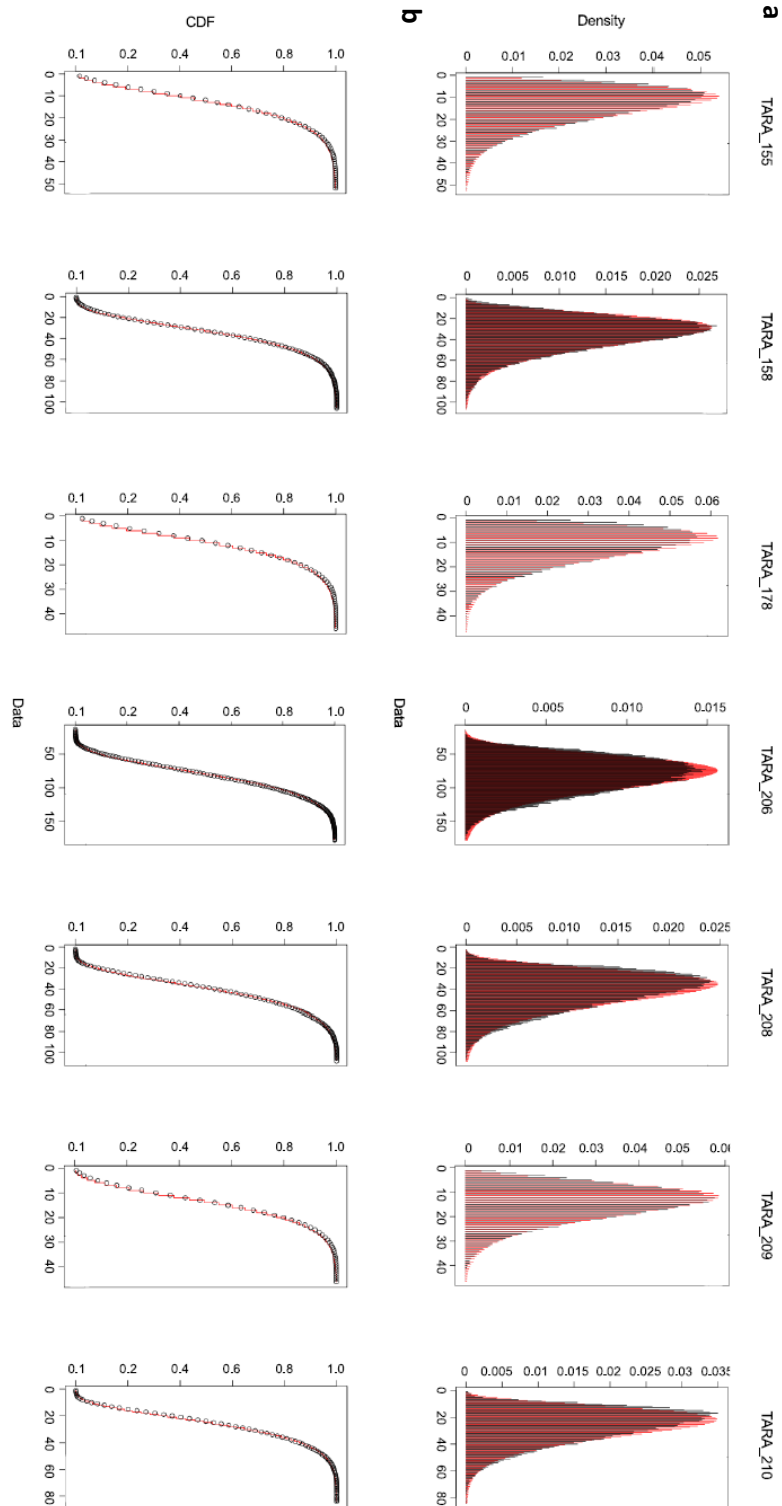

**Supplementary Figure 4: Metagenomic coverage distribution of the seven *Tara* Oceans samples.** Genomic depth of coverage distributions of the set of 25,768 variants obtained after filtering, by populations.

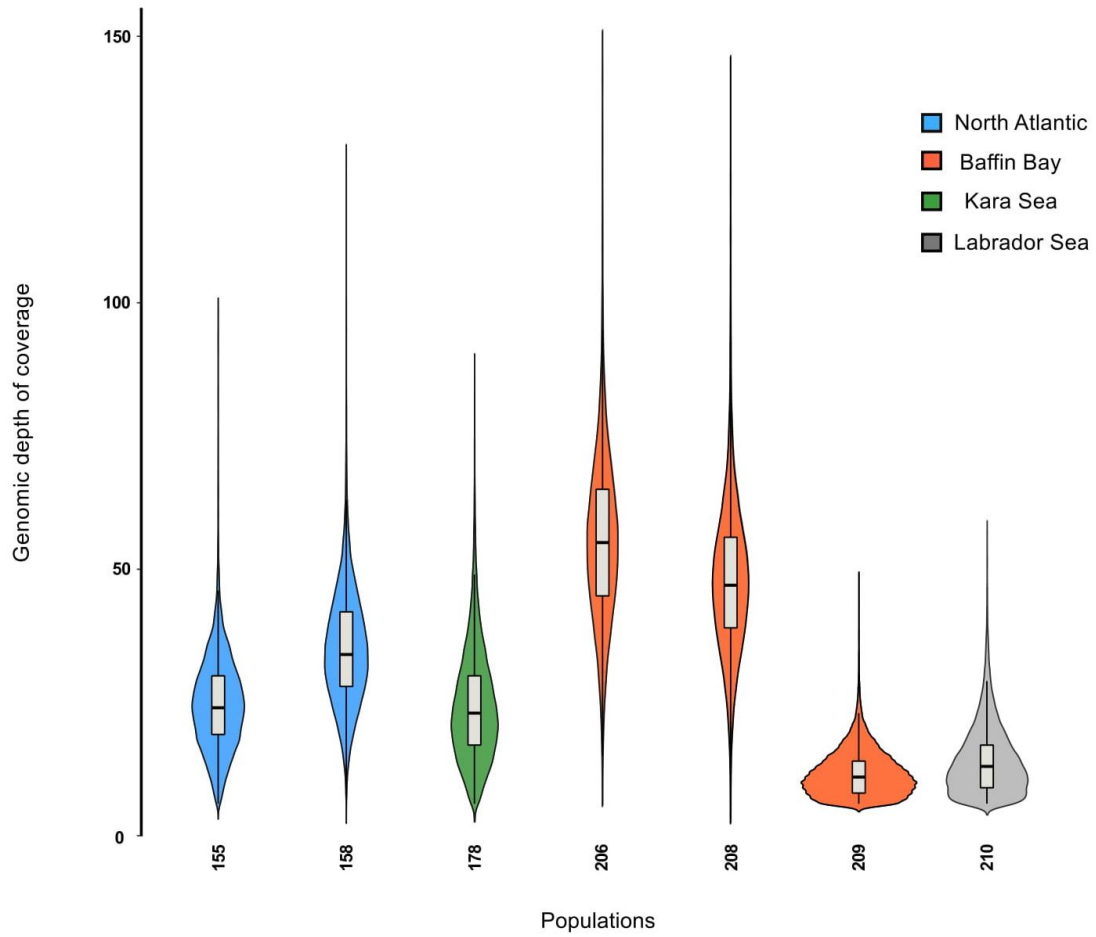

## Supplementary Figure 5: Genomic differentiation of Arctic Seas *Oithona similis* populations.

The three computations are based on the B-allele frequency matrix of the seven populations. **a**, Global  $F_{ST}$  distribution. **b**, LK distribution <sup>2</sup>. The red line represents the  $\chi^2$  theoretical distribution (df = 6). **c**, Pairwise- $F_{ST}$  distributions. **d** and **e** Principal Component Analysis from *pcadapt* <sup>3</sup> respectively displaying PC3 against PC4 and PC5 against PC6.

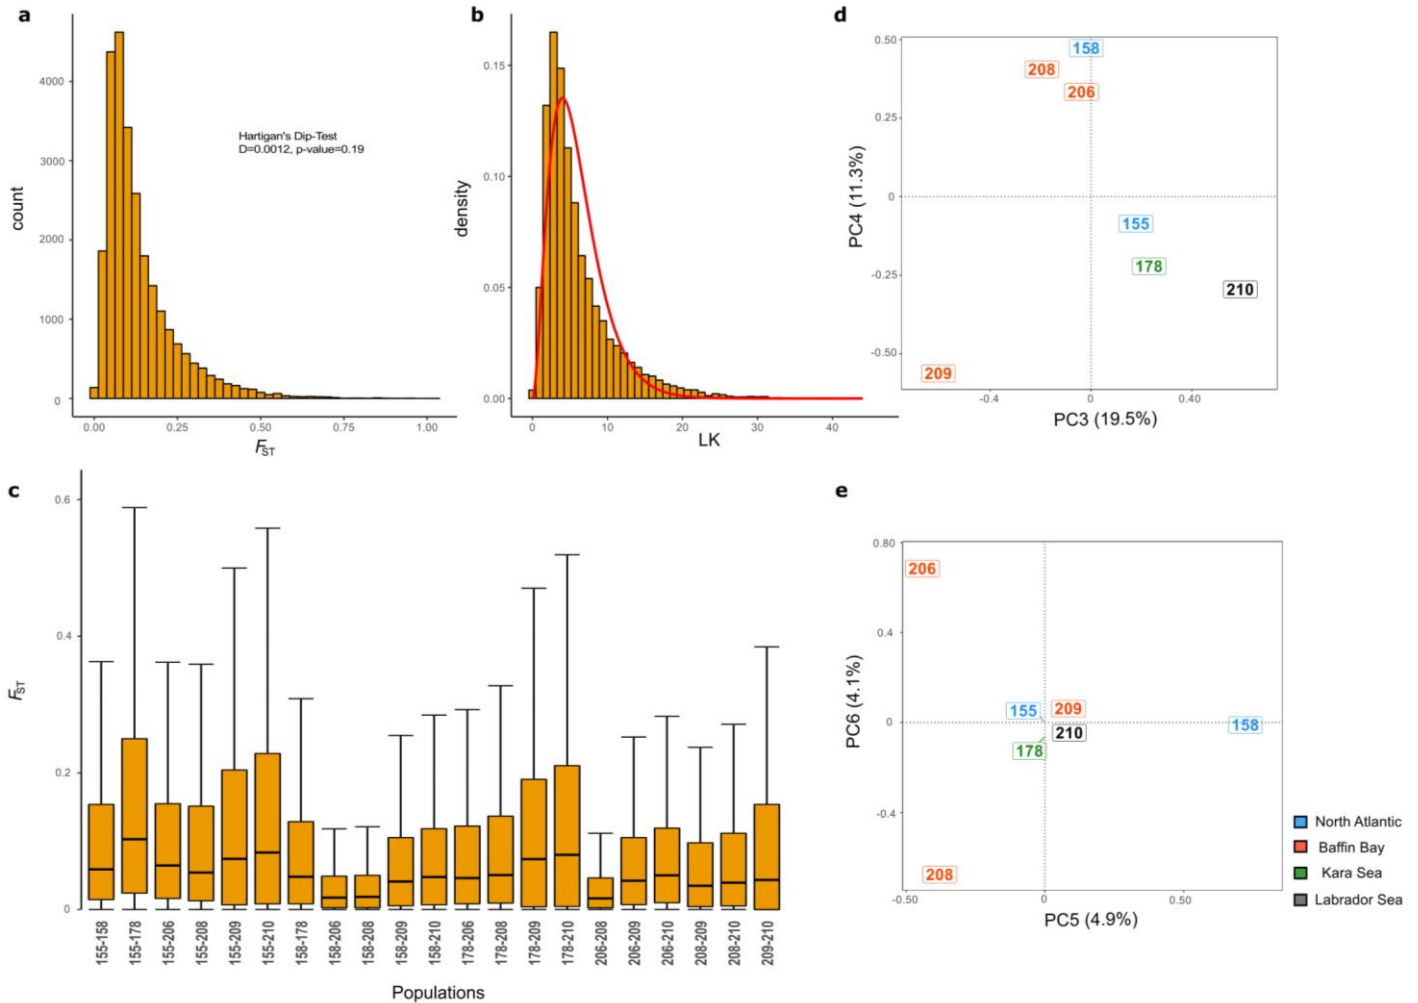

**Supplementary Figure 6: Allele-specific expression detection.** Red lines represent normal distribution estimated from the data.

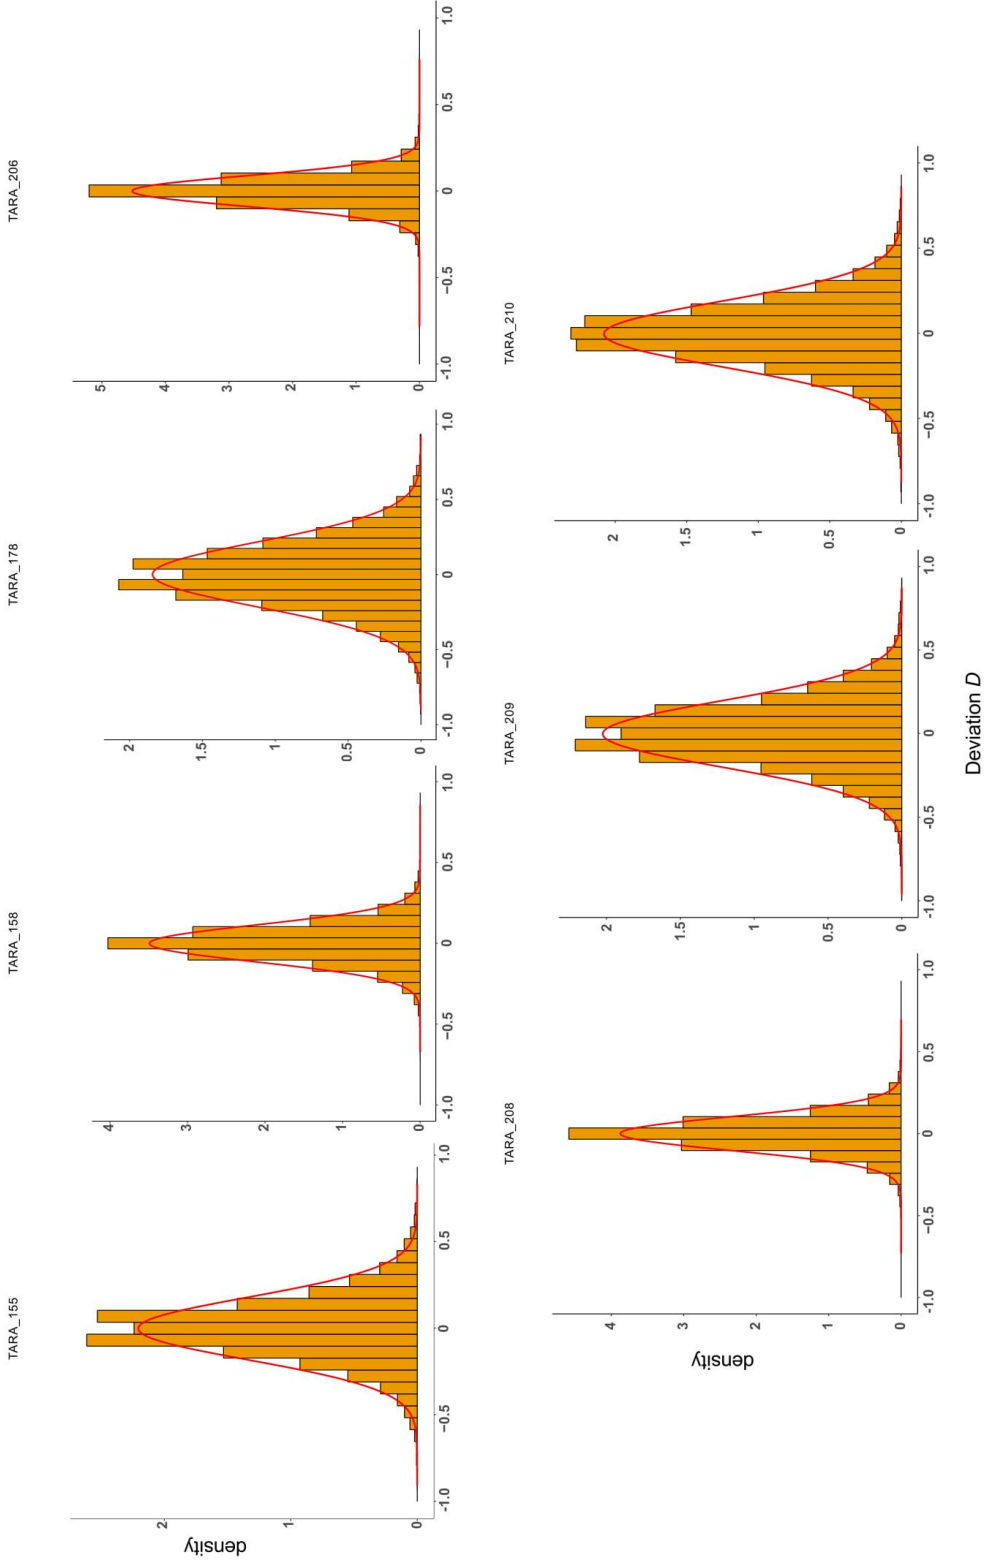



**Supplementary Figure 7: Functional analysis of *Oithona similis* transcripts targeted by ASE and selection.** The axes correspond to statistical metrics computed by *dcGO Enrichment*. Are highlighted the most significantly enriched terms in **a**, Biological Process GO-terms, **b**, Cellular Component GO-terms, **c**, Molecular Functions GO-terms.

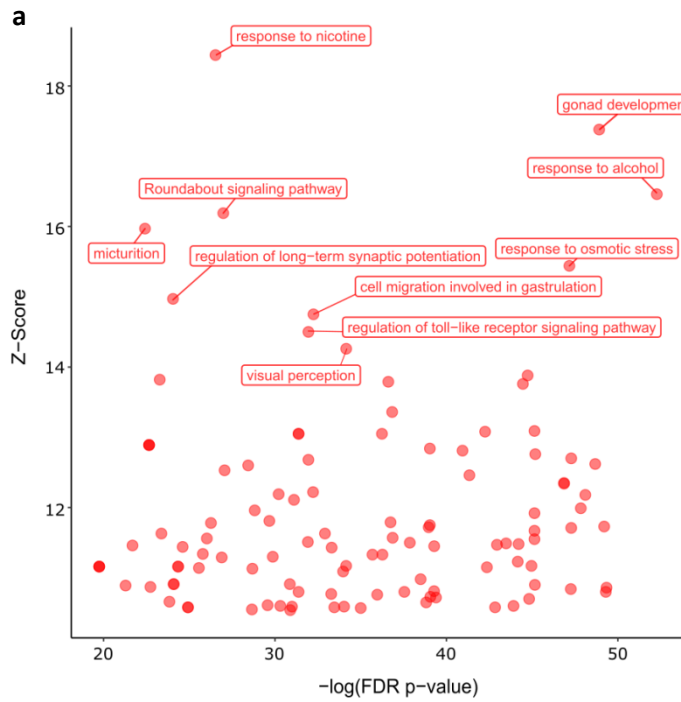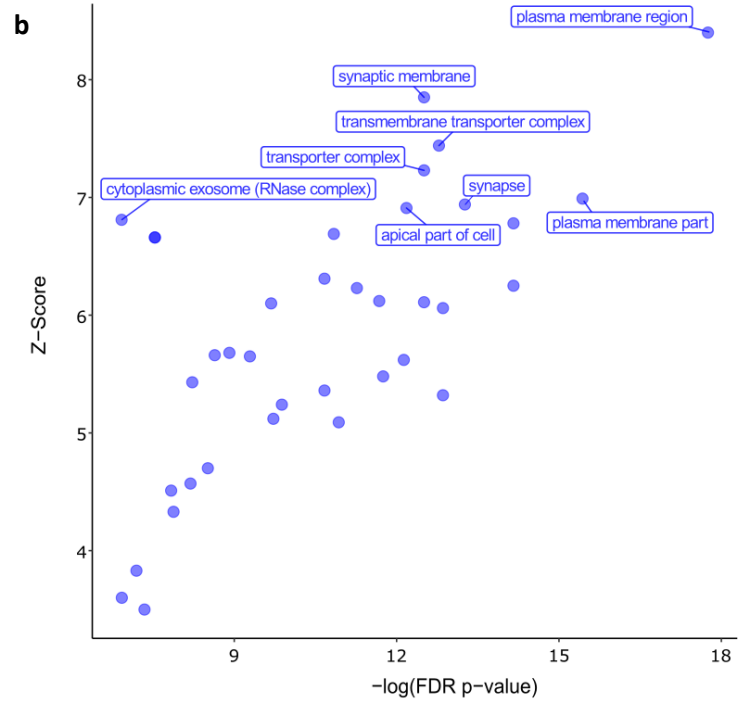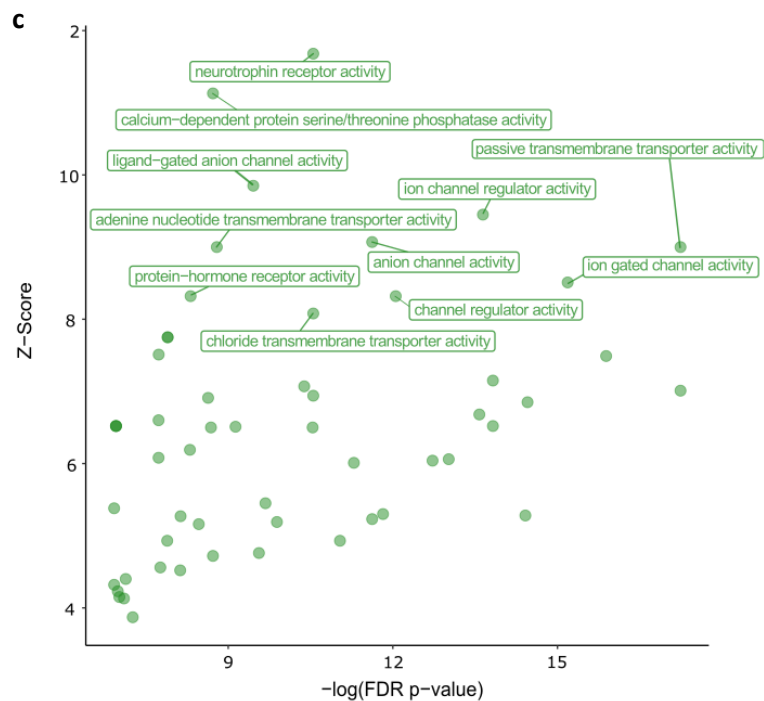

**Supplementary Table 1: *Oithona similis* Mediterranean transcriptomes summary.**

|                                                  | Copepodite |            |            |            | Male       |            |            |            |
|--------------------------------------------------|------------|------------|------------|------------|------------|------------|------------|------------|
|                                                  | 1          | 2          | 3          | 4          | 1          | 2          | 3          | 4          |
| <b>Number of reads</b>                           | 18,052,409 | 21,048,656 | 19,129,821 | 17,624,872 | 17,823,526 | 19,237,768 | 18,292,442 | 13,933,841 |
| <b>Number of transcripts</b>                     | 81,802     | 82,811     | 131,747    | 83,244     | 117,951    | 79,938     | 115,170    | 79,038     |
| <b>Number of transcripts with ORF prediction</b> | 20,389     | 20,963     | 42,404     | 20,746     | 38,580     | 19,488     | 34,179     | 20,482     |

**Supplementary Table 2: *Tara Oceans* and *Oithona similis* Mediterranean transcriptomes samples accession numbers**

| Sampling           | Type                       | Latitude | Longitude | Number of reads | Submission accession | Study accession | Sample accession | Experiment accession | Run accession |
|--------------------|----------------------------|----------|-----------|-----------------|----------------------|-----------------|------------------|----------------------|---------------|
| <i>Tara Oceans</i> | TARA_155 MetaG             | 54.5305  | -16.9377  | 182,925,026     | -                    | -               | -                | -                    | -             |
| <i>Tara Oceans</i> | TARA_155 MetaT             |          |           | 179,585,384     | -                    | -               | -                | -                    | -             |
| <i>Tara Oceans</i> | TARA_158 MetaG             | 67.1675  | 0.2177    | 138,512,807     | -                    | -               | -                | -                    | -             |
| <i>Tara Oceans</i> | TARA_158 MetaT             |          |           | 168,629,428     | -                    | -               | -                | -                    | -             |
| <i>Tara Oceans</i> | TARA_178 MetaG             | 77.1604  | 73.2057   | 207,442,505     | -                    | -               | -                | -                    | -             |
| <i>Tara Oceans</i> | TARA_178 MetaT             |          |           | 170,190,939     | -                    | -               | -                | -                    | -             |
| <i>Tara Oceans</i> | TARA_206 MetaG             | 70.9618  | -53.603   | 223,300,333     | -                    | -               | -                | -                    | -             |
| <i>Tara Oceans</i> | TARA_206 MetaT             |          |           | 189,447,541     | -                    | -               | -                | -                    | -             |
| <i>Tara Oceans</i> | TARA_208 MetaG             | 69.1136  | -51.5086  | 223,058,371     | -                    | -               | -                | -                    | -             |
| <i>Tara Oceans</i> | TARA_208 MetaT             |          |           | 184,221,525     | -                    | -               | -                | -                    | -             |
| <i>Tara Oceans</i> | TARA_209 MetaG             | 64.7127  | -53.0106  | 181,915,803     | -                    | -               | -                | -                    | -             |
| <i>Tara Oceans</i> | TARA_209 MetaT             |          |           | 178,106,374     | -                    | -               | -                | -                    | -             |
| <i>Tara Oceans</i> | TARA_210 MetaG             | 61.5442  | -55.9865  | 182,303,005     | -                    | -               | -                | -                    | -             |
| <i>Tara Oceans</i> | TARA_210 MetaT             |          |           | 179,419,896     | -                    | -               | -                | -                    | -             |
| Toulon             | Transcriptome Copepodite 1 | 43.1001  | 5.9482    | 17,823,526      | ERA1801976           | ERP114539       | ERS3342094       | ERX3282627           | ERR3255855    |
| Toulon             | Transcriptome Copepodite 2 | 43.1001  | 5.9482    | 19,237,768      | ERA1801976           | ERP114539       | ERS3342094       | ERX3282628           | ERR3255856    |
| Toulon             | Transcriptome Copepodite 3 | 43.1001  | 5.9482    | 18,292,442      | ERA1801976           | ERP114539       | ERS3342094       | ERX3282629           | ERR3255857    |
| Toulon             | Transcriptome Copepodite 4 | 43.1001  | 5.9482    | 13,933,841      | ERA1801976           | ERP114539       | ERS3342094       | ERX3282630           | ERR3255858    |
| Toulon             | Transcriptome Male 1       | 43.1001  | 5.9482    | 18,052,409      | ERA1801976           | ERP114539       | ERS3342094       | ERX3282631           | ERR3255859    |
| Toulon             | Transcriptome Male 2       | 43.1001  | 5.9482    | 21,048,656      | ERA1801976           | ERP114539       | ERS3342094       | ERX3282632           | ERR3255860    |
| Toulon             | Transcriptome Male 3       | 43.1001  | 5.9482    | 19,129,821      | ERA1801976           | ERP114539       | ERS3342094       | ERX3282633           | ERR3255861    |
| Toulon             | Transcriptome Male 4       | 43.1001  | 5.9482    | 17,624,872      | ERA1801976           | ERP114539       | ERS3342094       | ERX3282634           | ERR3255862    |

**Supplementary Table 5: Variant annotation by SNPeff.**

| SNPeff prediction     | Variants under ASE | Variants under selection | Variants under ASE & selection | Total         |
|-----------------------|--------------------|--------------------------|--------------------------------|---------------|
| Missense              | <b>54* (12.4%)</b> | <b>66* (12.6%)</b>       | 15 (9.9%)                      | 2529 (9.8%)   |
| Synonymous            | 170 (39.1%)        | 213 (40.8%)              | 59 (38.8%)                     | 11999 (46.6%) |
| Start lost            | 0                  | 0                        | 0                              | 4 (0.02%)     |
| Stop gained           | 1 (0.2%)           | 0                        | 0                              | 4 (0.02%)     |
| Stop retained         | 0                  | 0                        | 0                              | 2 (0.01%)     |
| 3'UTR                 | 75 (17.2%)         | <b>111* (21.3%)</b>      | 31 (20.4%)                     | 4480 (17.4%)  |
| 5'UTR                 | 80 (18.4%)         | 79 (15.1%)               | 29 (19.1%)                     | 4110 (16%)    |
| 5'UTR premature start | 12 (2.8%)          | 16 (3.1%)                | 3 (2%)                         | 778 (3%)      |
| No Transdecoder Hit   | 23 (5.3%)          | 20 (3.8%)                | 8 (5.3%)                       | 1142 (4.4%)   |
| Not mapped            | 20 (4.6%)          | 17 (3.3%)                | 7 (4.6%)                       | 720 (2.8%)    |
| <b>TOTAL</b>          | <b>435</b>         | <b>522</b>               | <b>152</b>                     | <b>25768</b>  |

## References

1. Cornils, A., Wend-Heckmann, B. & Held, C. Global phylogeography of *Oithona similis* s.l. (Crustacea, Copepoda, Oithonidae) – A cosmopolitan plankton species or a complex of cryptic lineages? *Mol. Phylogenet. Evol.* **107**, 473–485 (2017).
2. R.C., L. & J., K. Distribution of gene frequency as a test of the theory of the selective neutrality of polymorphisms. *Genetics* **74**, 175–195 (1973).
3. Luu, K., Bazin, E. & Blum, M. G. B. pcadapt: an R package to perform genome scans for selection based on principal component analysis. *Mol. Ecol. Resour.* **17**, 67–77 (2017).
